# Supplementary material
Source: publisher figshare collection journal article supplement (https://geolsoc.figshare.com/ndownloader/files/15167423)
Supplement: Supplementary file 1 [file 15167423]

## Sheet: supplementary data waypoints
Formation	Sample name	Latitude	Longitude
Fluvial Campodarbe	SP17	0° 40' 17.3424" W	42° 32' 5.6148" N
San Juan de la Peña conglomerates	SP1	0° 40' 45.9012" W	42° 31' 17.5404" N
San Juan de la Peña conglomerates	SP3	0° 41' 6.3240" W	42° 31' 10.6896" N
San Juan de la Peña conglomerates	SP18	0° 41' 15.8424" W	42° 30' 25.9164" N
